# Supplementary material for: INVESTIGATING ALTERNATIVES TO THE FISH EARLY-LIFE STAGE TEST: A STRATEGY FOR DISCOVERING AND ANNOTATING ADVERSE OUTCOME PATHWAYS FOR EARLY FISH DEVELOPMENT
Source: PubMed Central journal article supplement (PMC4119008; doi:10.1002/etc.2403), 2013-10-01

Supplementary Figure S1. Conceptual model of swimbladder development.

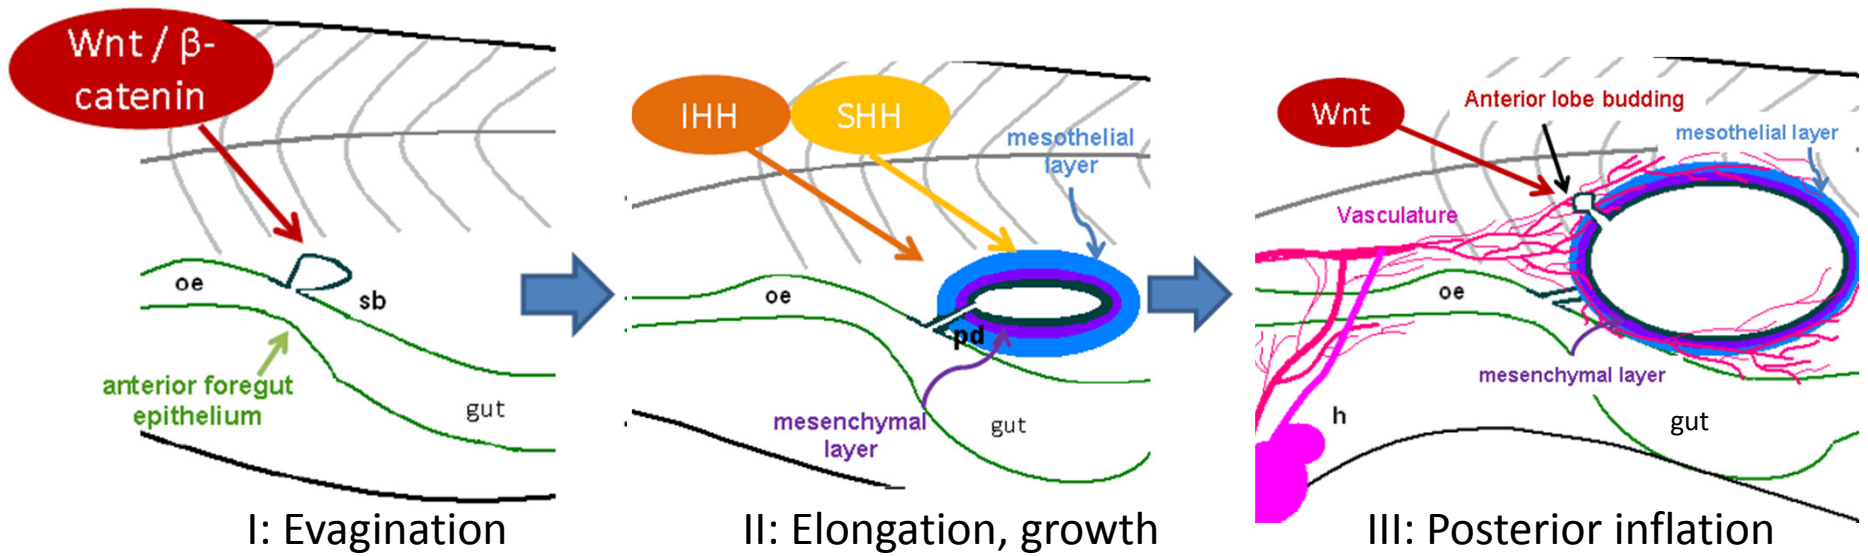

Adapted based on Winata et al. 2009.

oe = esophagus; sb = swimbladder; pd=pneumatic duct; h=heart; IHH=Indian hedgehog; SHH = sonic hedgehog.

Supplementary Figure S2. Upstream biological perturbations during swimbladder formation plausibly linked to the key event of impaired swimbladder inflation.

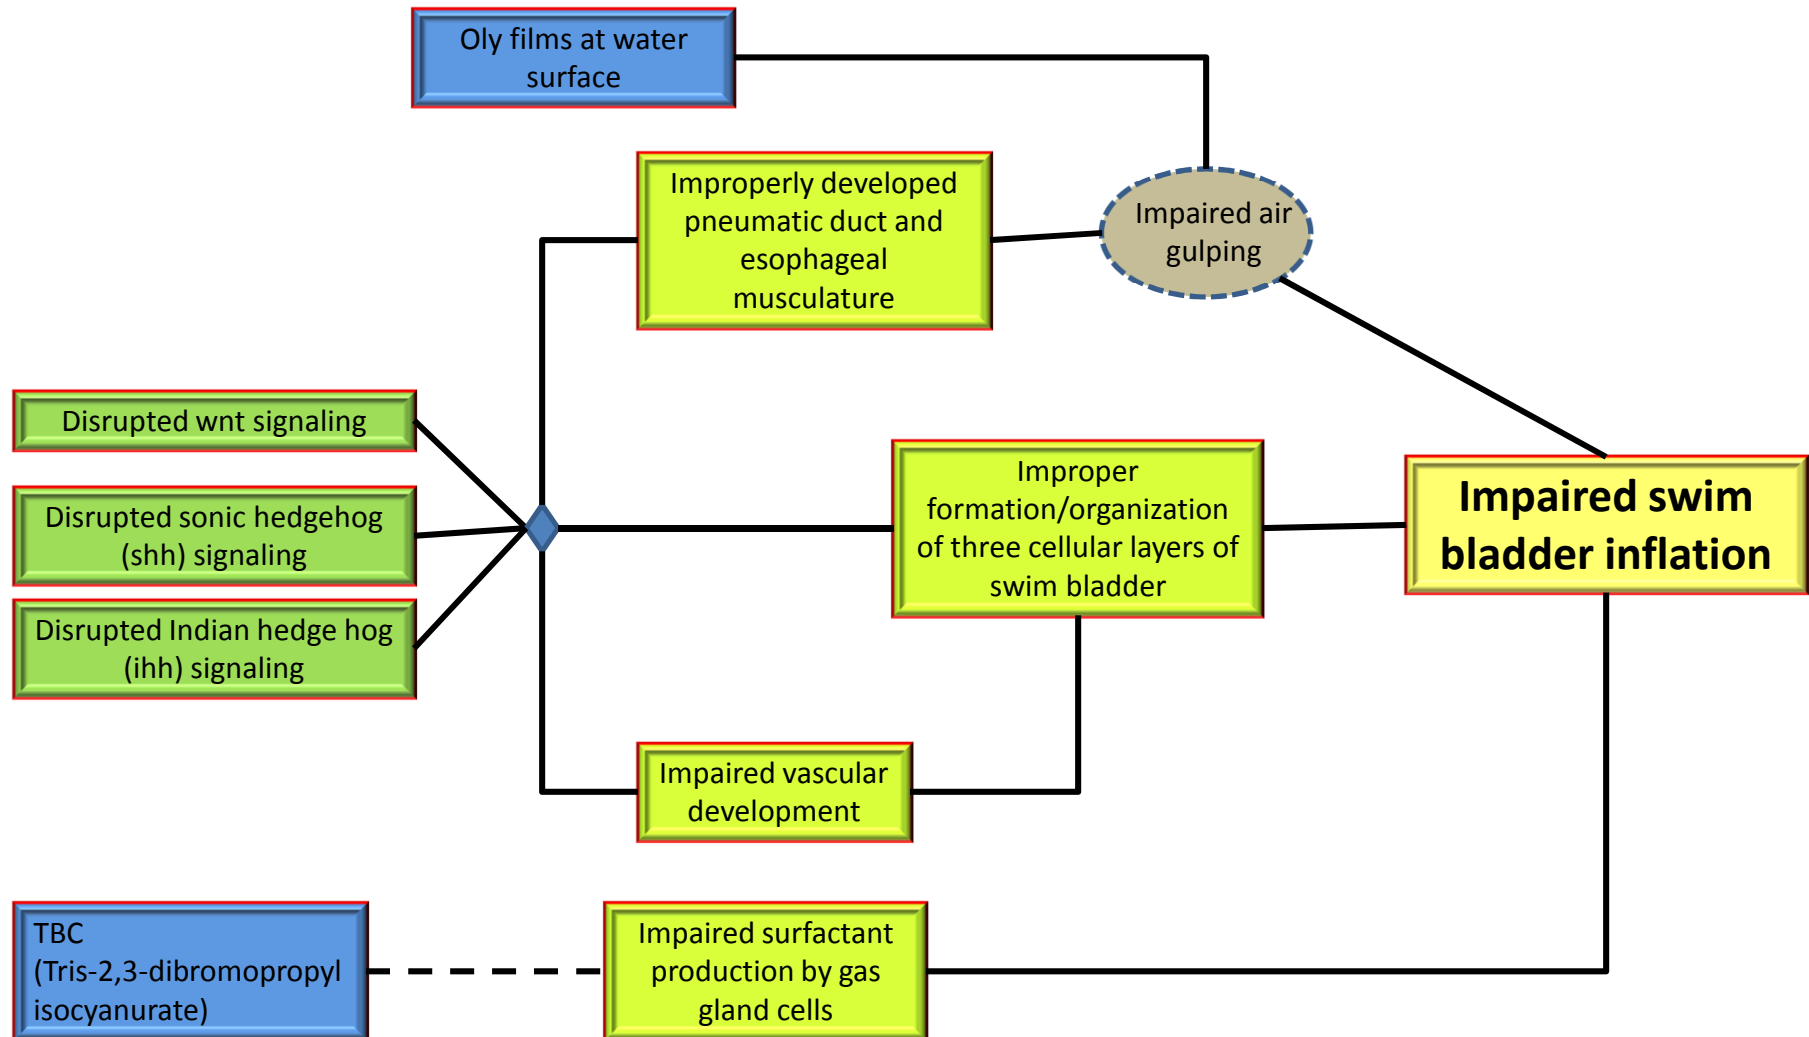

# Supplementary Figure S3. Conceptual model of key aspects of swimbladder function.

## Inflation

- Parasympathetic acetylcholine-mediated neurotransmission

## Deflation

- $\beta$ -adrenergic receptor mediated neurotransmission

### I. Passive diffusion (physotomes and physoclists)

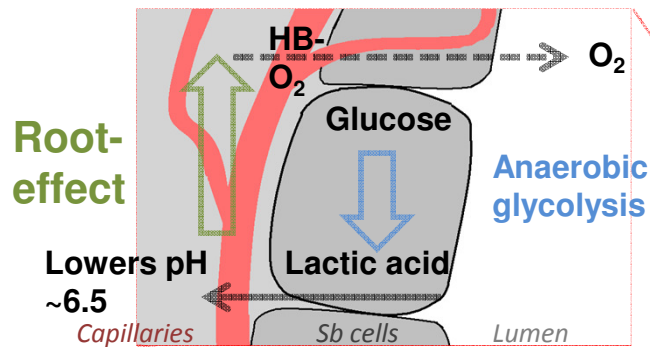

### I. Relaxation of smooth muscle, increased exposure of resorptive epithelium. (physotomes)

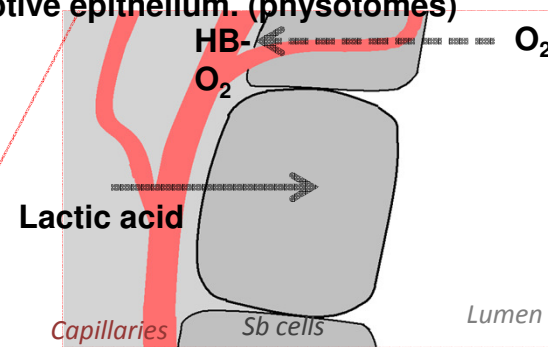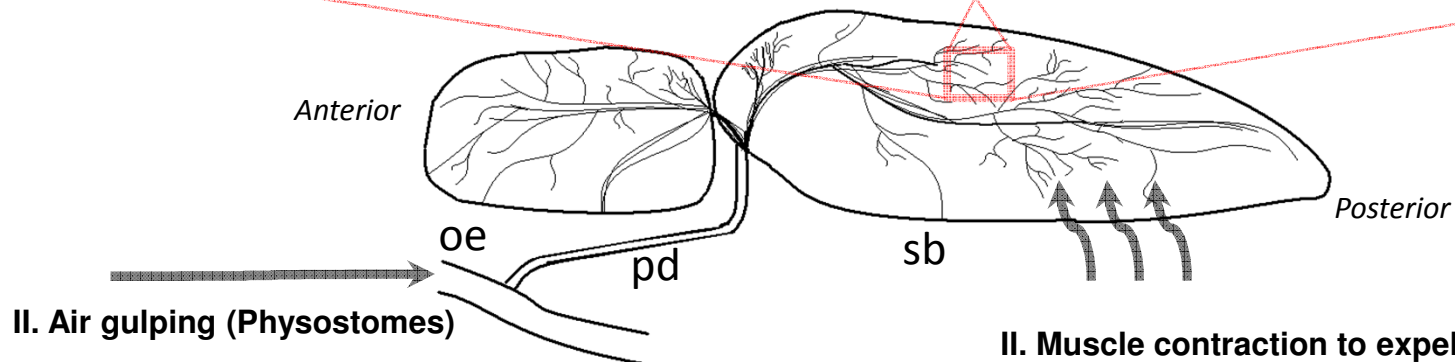

### II. Air gulping (Physostomes)

### II. Muscle contraction to expel gas (physostomes)

Adapted based on Dumbarton et al. 2010.

oe = esophagus; sb = swimbladder; pd=pneumatic duct;

Supplementary Figure S4. Upstream biological perturbations plausibly linked to the key event of impaired swimbladder inflation.

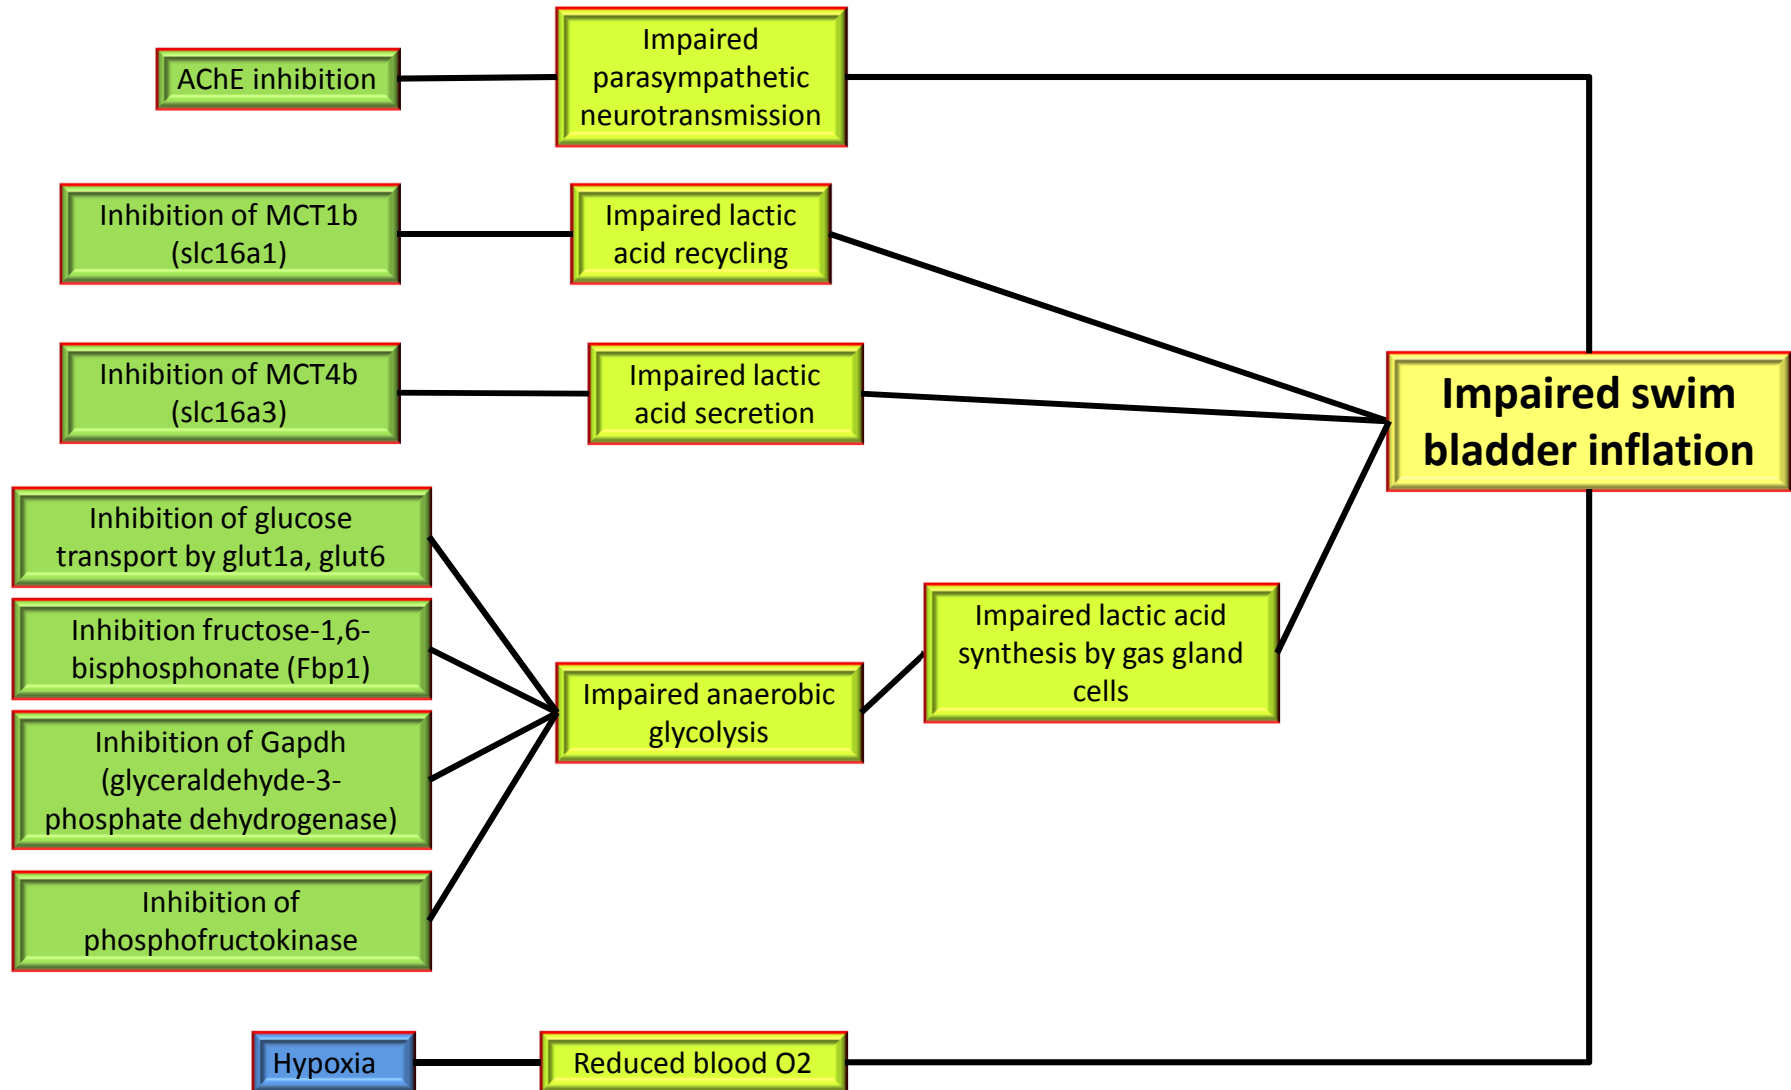

Supplement: NIHMS587534-supplement-1.pdf [file NIHMS587534-supplement-1.pdf]
